# Supplementary material for: Synergistic antimicrobial nanofiber membranes based on metal incorporated silica nanoparticles as advanced antimicrobial layers
Source: Royal Society of Chemistry journal article supplement (doi:10.1039/d4ra05052e), 2024-01-01
Supplement: d4ra05052e1.pdf [file d4ra05052e1.pdf]

Supplementary Data File 01

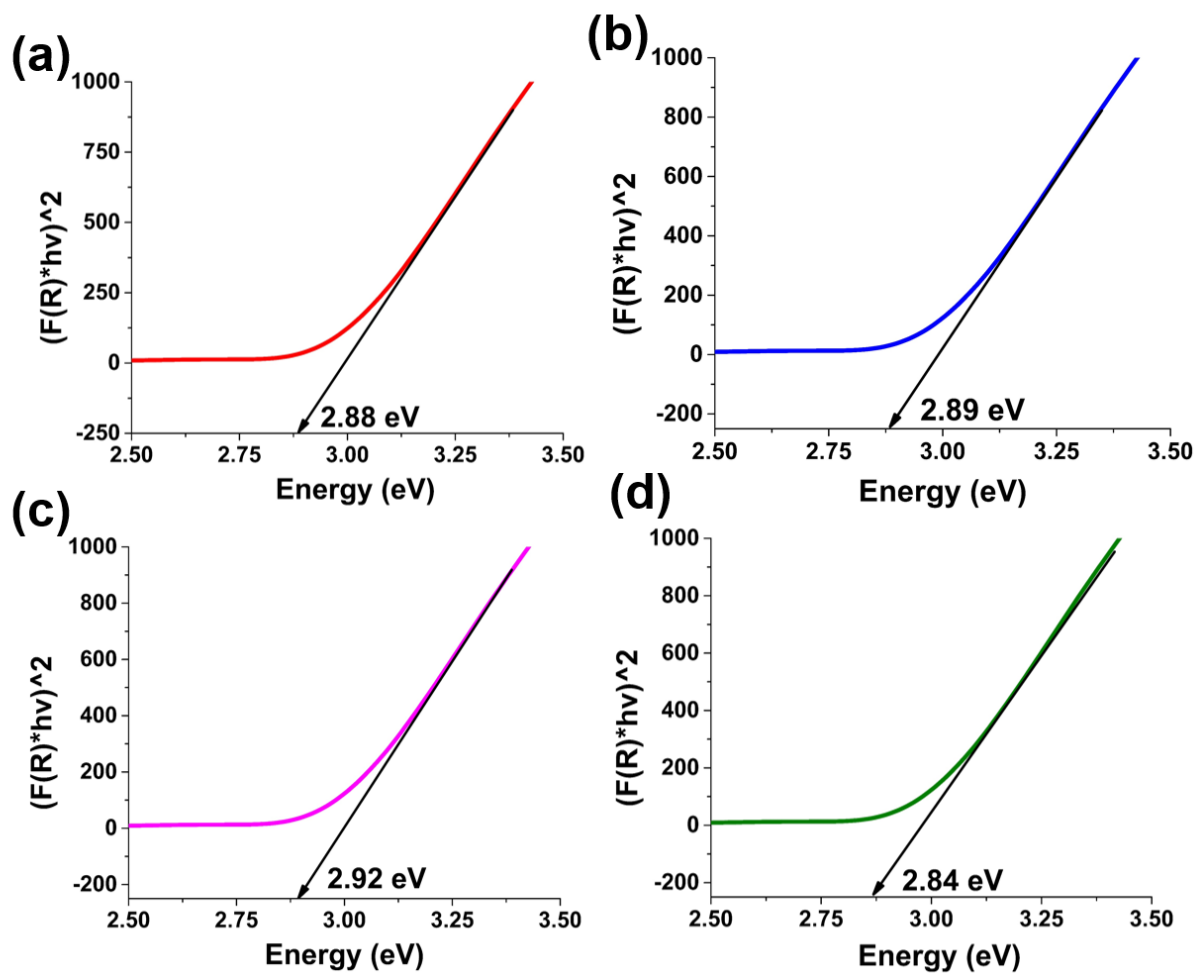

Supplementary data file 01: Band gap energy of; (a) Ag doped SiNP, (b) Cu doped SiNP, (c) Co doped SiNP and (d) Trimetallic silica nanohybrid of Ag+Cu+Co+SiNP incorporated cellulose acetate nanofiber mat.

## Supplementary Data File 02

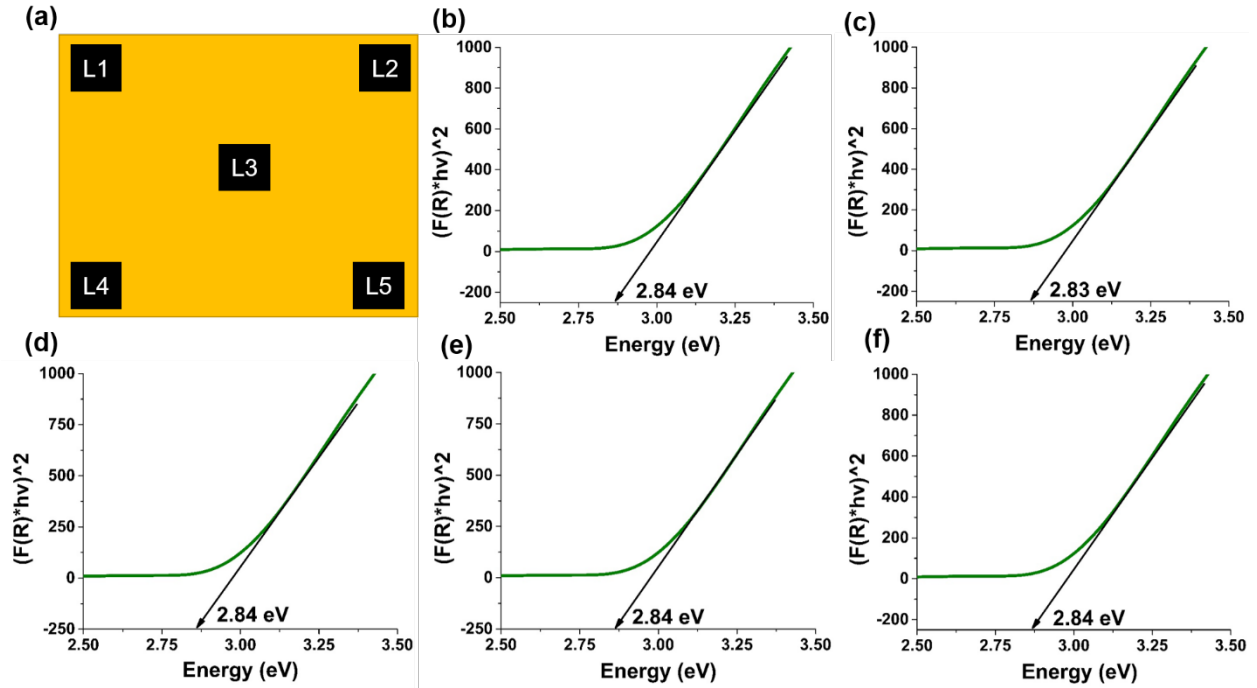

Supplementary data file 02: (a) Different places of the trimetallic silica nanohybrid incorporated nanofiber mat which were used for the analysis, Band gap energies of; (b) Point 'L1', (c) Point 'L2', (d) Point 'L3', (e) Point 'L4', and (f) Point 'L5'.

Supplementary Data File 03

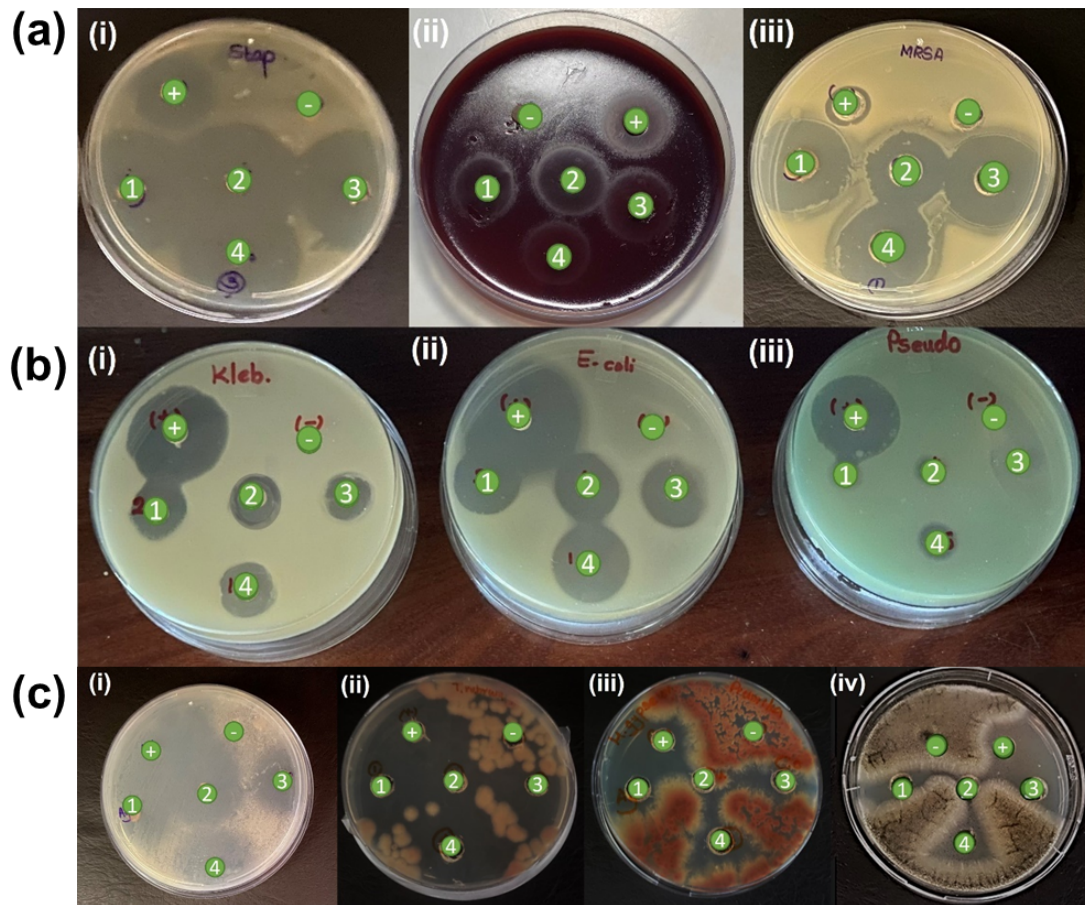

**Fig:** Zones of inhibition of (a) Gram positive bacteria; (i) *Staphylococcus aureus*, (ii) *Streptococcus pneumonia*, (iii) MRSA; (b) Gram negative bacteria; (i) *Klebsiella pneumoniae*, (ii) *Escherichia coli*, (iii) *Pseudomonas aeruginosa*; (c) Fungi; (i) *Candida albicans* (ii) *Trichophyton rubrum*, (iii) *Microsporium gypseum* and (iv) *Aspergillus niger* (+) Positive control, (-) Negative control, (1) Ag – Si – CA - mat, (2) Cu – Si – CA - mat, (3) Co – Si – CA - mat and (4) Ag – Si + Cu - Si + Co - Si – CA -mat.

**Table: Zones of inhibition of metallic silica nanohybrids incorporated nanofiber mats against ATCC cultures of all the test strains.**

| Type of the nanofiber mat/<br>Standard antibiotic | Zone of inhibition (mm) |                      |            |               |                      |                      |                    |                  |                    |                 |
|---------------------------------------------------|-------------------------|----------------------|------------|---------------|----------------------|----------------------|--------------------|------------------|--------------------|-----------------|
|                                                   | <i>S. aureus</i>        | <i>S. pneumoniae</i> | MRSA       | <i>E.coli</i> | <i>K. pneumoniae</i> | <i>P. aeruginosa</i> | <i>C. albicans</i> | <i>T. rubrum</i> | <i>M. gypsiu</i> m | <i>A. niger</i> |
| Positive control                                  | 32.67±0.58              | 22.00±0.00           | 22.00±0.00 | 30.00±0.00    | 22.67±0.58           | 22.67±0.58           | 32.33±0.58         | 23.67±0.58       | 20.67±0.58         | 20.00±0.00      |
| Negative control                                  | 0.00±0.00               | 0.00±0.00            | 0.00±0.00  | 0.00±0.00     | 0.00±0.00            | 0.00±0.00            | 0.00±0.00          | 0.00±0.00        | 0.00±0.00          | 0.00±0.00       |
| 1                                                 | 20.67±0.58              | 21.00±0.00           | 25.33±0.58 | 14.00±1.73    | 13.33±0.58           | 9.33±0.58            | 25.67±0.58         | 16.00±2.00       | 13.33±0.58         | 12.33±0.58      |
| 2                                                 | 19.33±0.58              | 19.67±0.58           | 24.00±1.00 | 12.67±1.15    | 11.33±0.58           | 8.00±0.00            | 23.67±0.58         | 14.00±0.00       | 11.67±0.58         | 11.00±0.00      |
| 3                                                 | 16.33±0.58              | 16.33±0.58           | 21.00±0.00 | 10.67±0.58    | 9.33±0.58            | 7.00±0.00            | 21.67±0.58         | 12.00±0.00       | 10.33±0.58         | 9.67±0.58       |
| 4                                                 | 22.33±0.58              | 22.33±0.58           | 28.33±0.58 | 16.33±0.58    | 15.00±0.00           | 11.33±0.58           | 30.00±0.58         | 21.67±0.58       | 16.00±0.00         | 16.00±0.00      |

(1) Ag – Si – CA - mat, (2) Cu – Si – CA - mat, (3) Co – Si – CA - mat and (4) Ag – Si + Cu - Si + Co - Si – CA -mat.

## Supplementary Data File 04

**Table: *p* values for each comparison of mean values of inhibition zones values of different metallic silica nanohybrids incorporated nanofiber mats using two sample T test**

| The significance difference between; | <i>p</i> value  |                      |        |               |                      |                      |                    |                  |                   |                 | The mean values are significantly different |
|--------------------------------------|-----------------|----------------------|--------|---------------|----------------------|----------------------|--------------------|------------------|-------------------|-----------------|---------------------------------------------|
|                                      | <i>S.aureus</i> | <i>S. pneumoniae</i> | MRSA   | <i>E.coli</i> | <i>K. pneumoniae</i> | <i>P. aeruginosa</i> | <i>C. albicans</i> | <i>T. rubrum</i> | <i>M. gypseum</i> | <i>A. niger</i> |                                             |
| 1                                    | 0.0001          | 0.0086               | 0.0002 | 0.0090        | 0.0005               | 0.0008               | 0.0005             | 0.0092           | 0.0161            | 0.0021          | Yes                                         |
| 2                                    | 0.0001          | 0.0072               | 0.0001 | 0.0091        | 0.0004               | 0.0007               | 0.0001             | 0.0003           | 0.0060            | 0.0008          | Yes                                         |
| 3                                    | 0.0010          | 0.0061               | 0.0002 | 0.0086        | 0.0005               | 0.0007               | 0.0001             | 0.0001           | 0.0010            | 0.0002          | Yes                                         |

(1) Ag – Si – CA - mat and Ag – Si + Cu - Si + Co - Si – CA -mat (\*\*\*), (2) Cu – Si – CA - mat and Ag – Si + Cu - Si + Co - Si – CA -mat (\*\*\*) and (3) ) Co – Si – CA - mat and Ag – Si + Cu - Si + Co - Si – CA -mat (\*).

Supplementary Data File 05

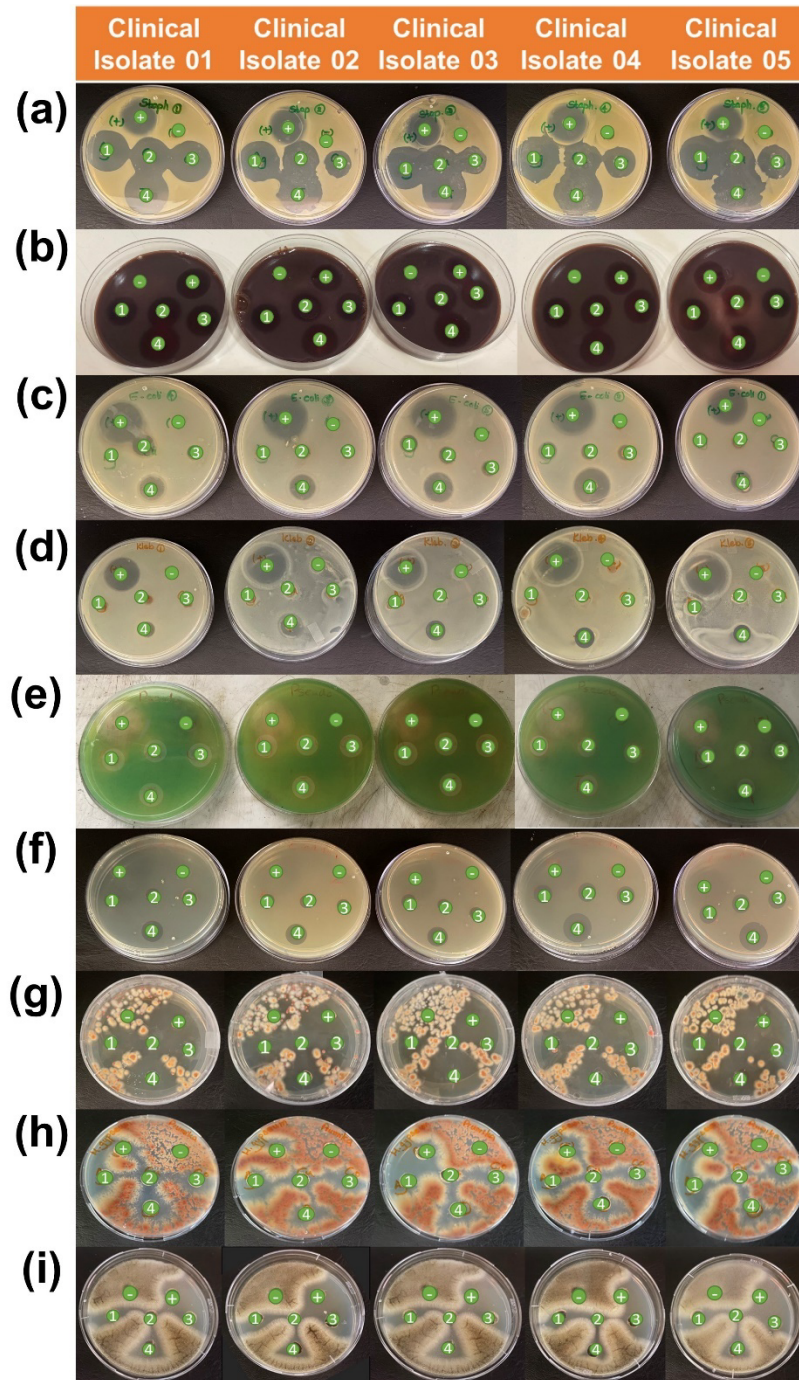

**Fig: Zones of inhibition of gram positive bacteria; (a) *Staphylococcus aureus*, (b) *Streptococcus pneumoniae*, gram negative bacteria; (c) *Klebsiella pneumoniae*, (d) *Escherichia coli*, (e) *Pseudomonas aeruginosa*; fungi; (f) *Candida albicans* (g) *Trichophyton rubrum*, (h) *Microsporium gypseum* and (i) *Aspergillus niger* (+) Positive control, (-) Negative control, (1) Ag - Si - CA - mat, (2) Cu - Si - CA - mat, (3) Co - Si - CA - mat and (4) Ag - Si + Cu - Si + Co - Si - CA -mat**

**Table: Zones of inhibition of metallic silica nanohybrids incorporated nanofiber mats against clinical isolates of previously tested ATCC cultures of all the test strains of bacteria**

|          | <i>Staphylococcus sp.</i> |       |       |       |       | <i>Streptococcus sp.</i> |       |       |       |       | <i>Escherichia coli strains</i> |       |       |       |       | <i>Klebsiella sp.</i>    |       |       |       |       | <i>Pseudomonas sp.</i>   |       |       |       |       |
|----------|---------------------------|-------|-------|-------|-------|--------------------------|-------|-------|-------|-------|---------------------------------|-------|-------|-------|-------|--------------------------|-------|-------|-------|-------|--------------------------|-------|-------|-------|-------|
|          | Clinical isolate No. 01   |       |       |       |       | Clinical isolate No. 02  |       |       |       |       | Clinical isolate No. 03         |       |       |       |       | Clinical isolates No. 04 |       |       |       |       | Clinical isolates No. 05 |       |       |       |       |
|          | 1                         | 2     | 3     | 4     | 5     | 1                        | 2     | 3     | 4     | 5     | 1                               | 2     | 3     | 4     | 5     | 1                        | 2     | 3     | 4     | 5     | 1                        | 2     | 3     | 4     | 5     |
| (+)      | 31.67                     | 31.67 | 31.67 | 31.00 | 31.67 | 22.67                    | 23.00 | 22.33 | 22.33 | 22.00 | 30.33                           | 31.00 | 30.67 | 30.67 | 31.33 | 22.00                    | 23.00 | 22.67 | 22.33 | 22.00 | 23.00                    | 22.67 | 22.33 | 22.33 | 22.33 |
| )        | ±                         | ±     | ±     | ±     | ±     | ±                        | ±     | ±     | ±     | ±     | ±                               | ±     | ±     | ±     | ±     | ±                        | ±     | ±     | ±     | ±     | ±                        | ±     | ±     | ±     | ±     |
|          | 0.58                      | 0.58  | 0.58  | 0.00  | 0.58  | 0.58                     | 0.00  | 0.58  | 0.58  | 0.00  | 0.58                            | 0.00  | 0.58  | 0.58  | 1.54  | 0.00                     | 0.00  | 0.58  | 0.58  | 0.00  | 0.00                     | 0.58  | 0.58  | 0.58  | 0.58  |
| (-)      | 0.00±                     | 0.00± | 0.00± | 0.00± | 0.00± | 0.00±                    | 0.00± | 0.00± | 0.00± | 0.00± | 0.00±                           | 0.00± | 0.00± | 0.00± | 0.00± | 0.00±                    | 0.00± | 0.00± | 0.00± | 0.00± | 0.00±                    | 0.00± | 0.00± | 0.00± | 0.00± |
|          | 0                         | 0.00  | 0.00  | 0.00  | 0.00  | 0.00                     | 0.00  | 0.00  | 0.00  | 0.00  | 0.00                            | 0.00  | 0.00  | 0.00  | 0.00  | 0.00                     | 0.00  | 0.00  | 0.00  | 0.00  | 0.00                     | 0.00  | 0.00  | 0.00  | 0.00  |
|          | .00                       |       |       |       |       |                          |       |       |       |       |                                 |       |       |       |       |                          |       |       |       |       |                          |       |       |       |       |
| <b>A</b> | 30.67                     | 31.67 | 30.67 | 31.00 | 30.67 | 21.33                    | 19.67 | 22.00 | 20.67 | 21.33 | 15.33                           | 15.67 | 16.33 | 14.00 | 14.67 | 13.33                    | 13.33 | 13.67 | 13.67 | 14.00 | 9.00±                    | 9.67± | 9.67± | 9.00± | 9.00± |
|          | ±                         | ±     | ±     | ±     | ±     | ±                        | ±     | ±     | ±     | ±     | ±                               | ±     | ±     | ±     | ±     | ±                        | ±     | ±     | ±     | ±     | 0.00                     | 0.58  | 0.58  | 0.00  | 0.00  |
|          | 0.58                      | 0.58  | 0.58  | 0.00  | 0.58  | 0.58                     | 0.58  | 0.00  | 0.58  | 0.58  | 0.58                            | 0.58  | 0.58  | 1.00  | 1.15  | 0.58                     | 0.58  | 0.58  | 0.58  | 0.00  |                          |       |       |       |       |
| <b>B</b> | 28.00                     | 27.00 | 27.67 | 28.00 | 28.00 | 20.00                    | 21.00 | 20.33 | 20.00 | 19.67 | 13.00                           | 14.00 | 14.00 | 13.67 | 13.00 | 11.00                    | 11.33 | 11.67 | 11.33 | 12.00 | 7.67±                    | 9.33± | 8.33± | 8.33± | 8.00± |
|          | ±                         | ±     | ±     | ±     | ±     | ±                        | ±     | ±     | ±     | ±     | ±                               | ±     | ±     | ±     | ±     | ±                        | ±     | ±     | ±     | ±     | 0.58                     | 0.58  | 0.58  | 0.58  | 0.00  |
|          | 0.5                       | 0.5   | 0.58  | 0.5   | 0.5   | 1.00                     | 1.00  | 0.58  | 0.00  | 0.58  | 1.00                            | 0.00  | 0.00  | 0.58  | 0.00  | 0.00                     | 0.58  | 0.58  | 0.58  | 0.00  |                          |       |       |       |       |
| <b>C</b> | 24.67                     | 25.00 | 24.67 | 24.67 | 25.00 | 17.00                    | 15.67 | 17.00 | 17.00 | 17.67 | 10.00                           | 10.67 | 10.67 | 11.33 | 10.00 | 9.33±                    | 9.67± | 9.33± | 10.00 | 9.67± | 7.00±                    | 8.00± | 7.33± | 7.33± | 7.33± |
|          | ±                         | ±     | ±     | ±     | ±     | ±                        | ±     | ±     | ±     | ±     | ±                               | ±     | ±     | ±     | ±     | ±                        | ±     | ±     | ±     | ±     | 0.00                     | 0.00  | 0.58  | 0.58  | 0.58  |
|          | 0.58                      | 0.5   | 0.58  | 0.58  | 0.00  | 0.00                     | 0.58  | 1.00  | 1.00  | 0.58  | 0.00                            | 0.58  | 0.58  | 0.58  | 0.00  |                          |       |       | 0.00  |       |                          |       |       |       |       |
| <b>D</b> | 32.00                     | 32.00 | 32.67 | 32.00 | 31.67 | 23.33                    | 23.67 | 23.33 | 22.67 | 23.00 | 17.33                           | 18.00 | 18.00 | 17.67 | 17.33 | 14.67                    | 15.33 | 15.00 | 14.67 | 15.67 | 11.00                    | 11.00 | 11.67 | 11.33 | 11.33 |
|          | ±                         | ±     | ±     | ±     | ±     | ±                        | ±     | ±     | ±     | ±     | ±                               | ±     | ±     | ±     | ±     | ±                        | ±     | ±     | ±     | ±     | ±                        | ±     | ±     | ±     | ±     |
|          | 0.00                      | 0.5   | 0.58  | 0.00  | 0.58  | 0.58                     | 0.58  | 0.58  | 0.58  | 0.00  | 0.58                            | 0.00  | 0.00  | 0.58  | 0.58  | 0.58                     | 0.58  | 0.00  | 0.58  | 0.58  | 0.00                     | 0.00  | 0.58  | 0.58  | 0.58  |

**Table: Zones of inhibition of metallic silica nanohybrids incorporated nanofiber mats against clinical isolates of previously tested ATCC cultures of all the test strains of fungi**

|          | <i>Candida albicans</i> |        |        |        |        | <i>Trichophyton rubrum</i> |        |        |        |        | <i>Microsporum gypseum</i> |        |        |        |        | <i>Aspergillus niger</i> |        |        |        |        |        |        |        |        |
|----------|-------------------------|--------|--------|--------|--------|----------------------------|--------|--------|--------|--------|----------------------------|--------|--------|--------|--------|--------------------------|--------|--------|--------|--------|--------|--------|--------|--------|
|          | Clinical isolate        |        |        |        |        | Clinical isolate           |        |        |        |        | Clinical isolate           |        |        |        |        | Clinical isolates        |        |        |        |        |        |        |        |        |
|          | 1                       | 2      | 3      | 4      | 5      | 1                          | 2      | 3      | 4      | 5      | 1                          | 2      | 3      | 4      | 5      | 1                        | 2      | 3      | 4      | 5      |        |        |        |        |
| (+)      | 32.67±                  | 32.67± | 32.00± | 32.00± | 32.00± | 23.67±                     | 20.00± | 23.00± | 23.33± | 23.67± | 21.00±                     | 20.67± | 20.00± | 21.00± | 20.67± | 20.00±                   | 20.33± | 20.00± | 20.67± | 21.00± | 20.33± | 20.00± | 20.67± | 21.00± |
|          | 0.58                    | 0.58   | 0.00   | 0.00   | 0.00   | 0.58                       | 0.00   | 0.58   | 0.58   | 0.00   | 0.00                       | 0.58   | 0.00   | 0.58   | 0.58   | 0.00                     | 0.58   | 0.00   | 0.58   | 0.00   | 0.58   | 0.00   | 0.58   | 0.00   |
| (-)      | 0.00±0                  | 0.00±  | 0.00±  | 0.00±  | 0.00±  | 0.00±                      | 0.00±  | 0.00±  | 0.00±  | 0.00±  | 0.00±                      | 0.00±  | 0.00±  | 0.00±  | 0.00±  | 0.00±                    | 0.00±  | 0.00±  | 0.00±  | 0.00±  | 0.00±  | 0.00±  | 0.00±  | 0.00±  |
|          | .00                     | 0.00   | 0.00   | 0.00   | 0.00   | 0.00                       | 0.00   | 0.00   | 0.00   | 0.00   | 0.00                       | 0.00   | 0.00   | 0.00   | 0.00   | 0.00                     | 0.00   | 0.00   | 0.00   | 0.00   | 0.00   | 0.00   | 0.00   | 0.00   |
| <b>A</b> | 30.67±                  | 30.00± | 29.00± | 28.50± | 28.50± | 16.00±                     | 16.33± | 16.67± | 16.00± | 16.33± | 13.67±                     | 13.33± | 13.67± | 13.00± | 13.00± | 12.67±                   | 12.33± | 12.67± | 12.67± | 12.00± | 12.67± | 12.67± | 12.67± | 12.00± |
|          | 0.58                    | 1.00   | 1.00   | 0.00   | 0.58   | 0.00                       | 0.58   | 0.58   | 0.00   | 0.58   | 0.58                       | 0.58   | 0.58   | 0.00   | 0.00   | 0.58                     | 0.58   | 0.00   | 0.58   | 0.58   | 0.58   | 0.58   | 0.58   | 0.00   |
| <b>B</b> | 27.00±                  | 26.50± | 26.50± | 27.00± | 28.00± | 14.67±                     | 14.33± | 14.67± | 14.00± | 14.00± | 11.00±                     | 11.67± | 11.00± | 11.67± | 11.67± | 11.33±                   | 11.00± | 11.00± | 11.67± | 10.67± | 11.00± | 11.00± | 10.67± | 10.67± |
|          | 0.5                     | 0.50   | 0.00   | 1.00   | 0.5    | 0.58                       | 0.58   | 0.58   | 0.00   | 0.00   | 0.58                       | 0.58   | 0.58   | 0.58   | 0.58   | 0.58                     | 0.00   | 0.58   | 0.58   | 0.58   | 0.00   | 0.00   | 0.58   | 0.58   |
| <b>C</b> | 24.67±                  | 25.00± | 25.00± | 25.00± | 25.00± | 12.33±                     | 12.67± | 12.67± | 12.67± | 12.67± | 10.00±                     | 10.33± | 10.67± | 10.00± | 10.00± | 9.00±                    | 9.33±  | 9.66±  | 10.00± | 10.00± | 9.00±  | 9.33±  | 9.66±  | 10.00± |
|          | 0.58                    | 1.00   | 0.00   | 0.00   | 0.00   | 0.58                       | 0.58   | 0.58   | 0.58   | 0.58   | 0.00                       | 0.58   | 0.58   | 0.58   | 0.00   | 0.00                     | 0.58   | 0.58   | 0.00   | 0.00   | 0.58   | 0.58   | 0.00   | 0.00   |
| <b>D</b> | 32.00±                  | 31.00± | 31.00± | 31.67± | 31.67± | 21.33±                     | 21.33± | 21.66± | 21.00± | 22.00± | 16.33±                     | 16.67± | 16.00± | 16.67± | 16.00± | 15.33±                   | 15.67± | 16.00± | 15.67± | 16.00± | 15.67± | 15.67± | 15.67± | 16.00± |
|          | 1.00                    | 1.00   | 0.00   | 0.58   | 0.58   | 0.58                       | 0.58   | 0.58   | 0.00   | 0.00   | 0.58                       | 0.58   | 0.00   | 0.58   | 0.58   | 0.58                     | 0.58   | 0.00   | 0.58   | 0.58   | 0.00   | 0.58   | 0.58   | 0.00   |

**(+) Positive control, (-) Negative control, (A) Ag – Si – CA - mat, (B) Cu – Si – CA - mat, (C) Co – Si – CA - mat and (D) Ag – Si + Cu - Si + Co - Si – CA -mat**



## Supplementary Data File 06

**Table: *p* values for each comparison of mean values of inhibition zones values of different metallic silica nanohybrids incorporated nanofiber mats using two sample T test**

| The significance difference between; | <i>p</i> value  |                      |         |               |                      |                      |                    |                  |                   |                 | The mean values are significantly different |
|--------------------------------------|-----------------|----------------------|---------|---------------|----------------------|----------------------|--------------------|------------------|-------------------|-----------------|---------------------------------------------|
|                                      | <i>S.aureus</i> | <i>S. pneumoniae</i> | MRSA    | <i>E.coli</i> | <i>K. pneumoniae</i> | <i>P. aeruginosa</i> | <i>C. albicans</i> | <i>T. rubrum</i> | <i>M. gypseum</i> | <i>A. niger</i> |                                             |
| 1                                    | <0.0001         | <0.0001              | <0.0001 | <0.0001       | <0.0001              | <0.0001              | <0.0001            | <0.0001          | <0.0001           | <0.0001         | Yes                                         |
| 2                                    | <0.0001         | <0.0001              | <0.0001 | <0.0001       | <0.0001              | <0.0001              | <0.0001            | <0.0001          | <0.0001           | <0.0001         | Yes                                         |
| 3                                    | <0.0001         | <0.0001              | <0.0001 | <0.0001       | <0.0001              | <0.0001              | <0.0001            | <0.0001          | <0.0001           | <0.0001         | Yes                                         |

(1) Ag – Si – CA - mat and Ag – Si + Cu - Si + Co - Si – CA -mat (\*\*\*) , (2) Cu – Si – CA - mat and Ag – Si + Cu - Si + Co - Si – CA -mat (\*\* ) and (3) ) Co – Si – CA - mat and Ag – Si + Cu - Si + Co - Si – CA -mat (\*).

**Supplementary Data File 07**

**(a)**

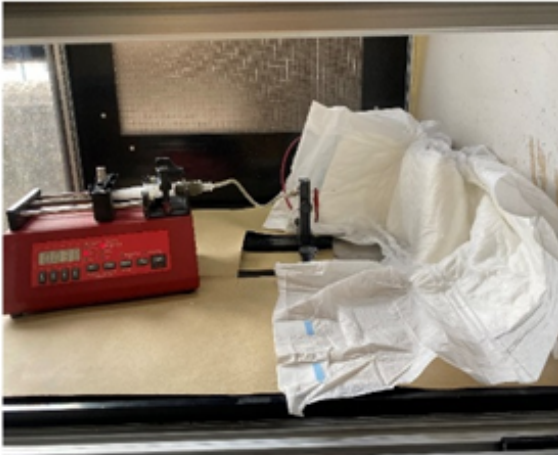

**(b)**

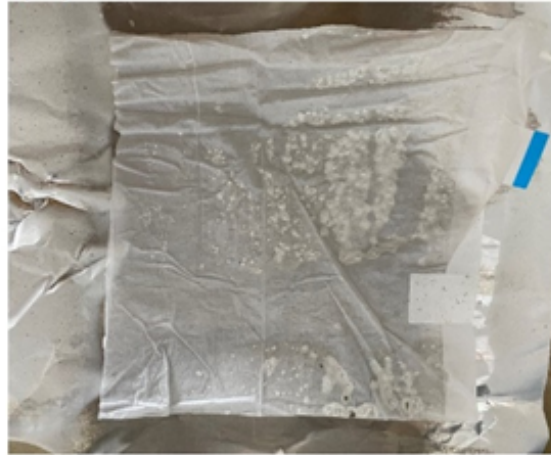

**Supplementary data file 07: (a) The process of the electrospinning on the surface of a diaper and (b) Resulted nanofiber mat on the surface of the diaper.**

## Supplementary Data File 08

**Table:  $p$  values of the one-way ANOVA test performed**

| Microorganism        | $p$ value | Significantly different or not |
|----------------------|-----------|--------------------------------|
| <i>S. aureus</i>     | 0.61      | No                             |
| <i>S. pneumonia</i>  | 0.88      | No                             |
| <i>MRSA</i>          | 0.92      | No                             |
| <i>E. coli</i>       | 0.07      | No                             |
| <i>K. pneumoniae</i> | 0.09      | No                             |
| <i>P. aureginosa</i> | 0.57      | No                             |
